# Supplementary material for: Prognostic value of CD34 expression status in patients with myxofibrosarcomas and undifferentiated pleomorphic sarcomas
Source: PubMed Central journal article supplement (PMC8322140; doi:10.1038/s41598-021-94834-w), 2021-07-29
Supplement: 41598_2021_94834_MOESM1_ESM.pdf [file 41598_2021_94834_MOESM1_ESM.pdf]

**Prognostic value of CD34 expression status in patients with myxofibrosarcomas and undifferentiated pleomorphic sarcomas**

Yoshiya Sugiura, MD; Rikuo Machinami, MD, PhD; Seiichi Matsumoto, MD, PhD; Hiroaki Kanda, MD, PhD; Keisuke Ae, MD, PhD; Yutaka Takazawa, MD, PhD; Kengo Takeuchi, MD, PhD

## Supplementary Figures

(a) CD34-positive patients

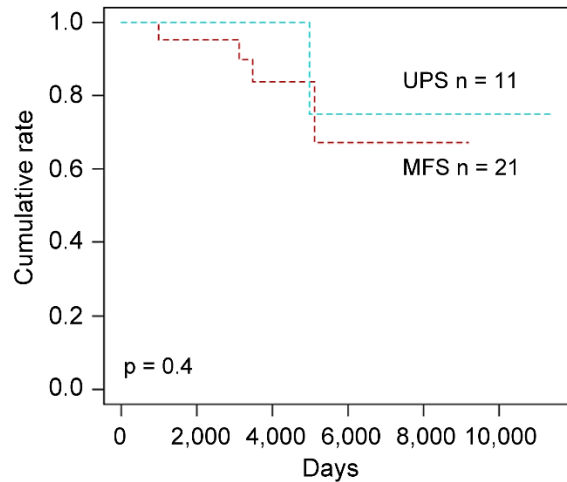

(b) CD34-negative patients

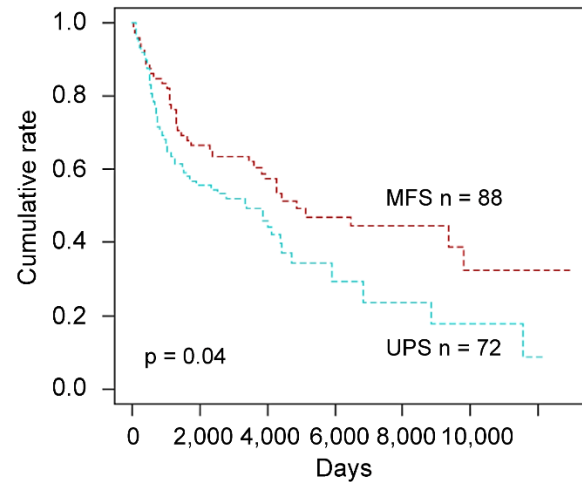

### Supplementary Figure S1: Overall survival of patients who were CD34-positive versus CD34-negative according to disease histology.

Among patients who were CD34-positive, no significant difference was observed between those diagnosed with myxofibrosarcoma (MFS) versus undifferentiated pleomorphic sarcoma (UPS) (A).

However, among patients who were CD34-negative, those with MFS showed significantly better overall survival than did those with UPS (B).

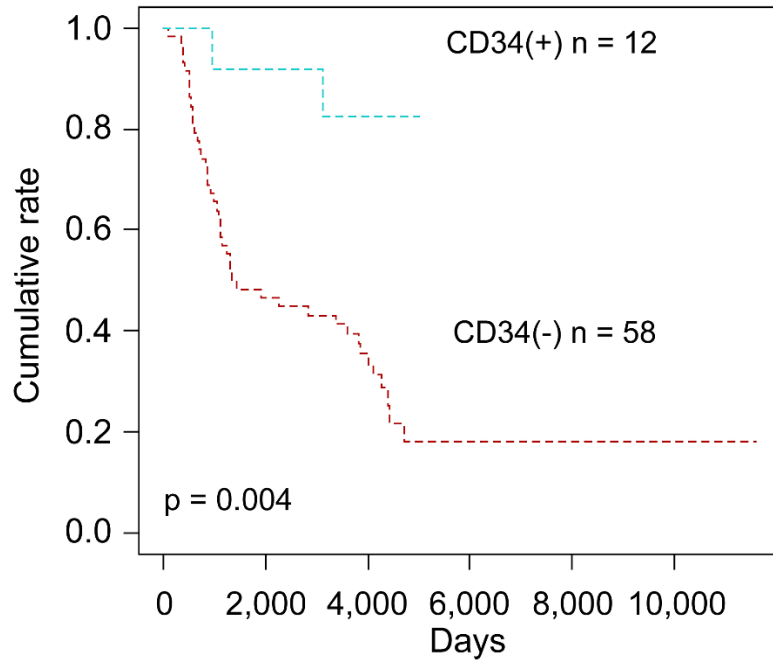

**Supplementary Figure S2: Overall survival of patients with postoperative local recurrence and/or distant metastasis.**

CD34-positive patients showed significantly better overall survival than their CD34-negative counterparts.

**(a) CD34-positive cases**

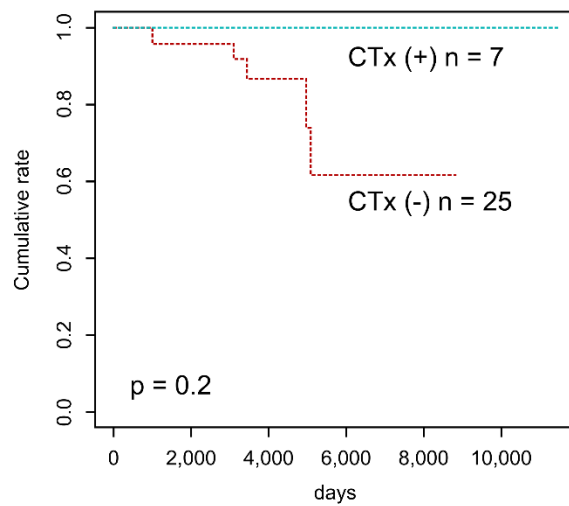

**(b) CD34-negative cases**

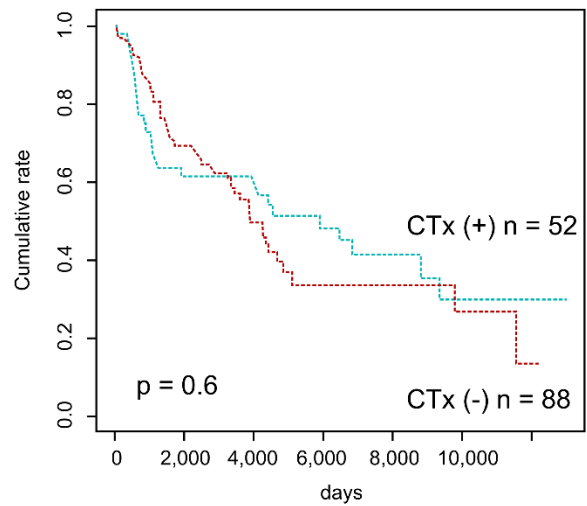

**Supplementary Figure S3: Effect of chemotherapy on the survival of CD34-positive and CD34-negative patients**

Compared to CD34-negative patients, in CD34-positive patients, chemotherapy tended to more efficiently improve the overall survival, but this was not statistically significant. CTx (+), chemotherapy was administered; CTx (-), chemotherapy was not administered

**Supplementary Table S1. Immunohistochemistry**

|                              | <i>Total (n=192)</i> |                     |
|------------------------------|----------------------|---------------------|
| <b>Antibody</b>              | <i>MFS (n = 93)</i>  | <i>UPS (n = 99)</i> |
| Desmin                       |                      |                     |
| Very focally positive (<10%) | n = 4                | n = 10              |
| Negative                     | n = 89               | n = 89              |
| S100                         |                      |                     |
| Very focally positive (<10%) | n = 1                | n = 6               |
| Negative                     | n = 92               | n = 93              |
| CK-AE1/AE3                   |                      |                     |
| Very focally positive (<10%) | n = 0                | n = 1               |
| Negative                     | n = 93               | n = 98              |
| MDM2                         |                      |                     |
| Negative                     | n= 93                | n = 99              |

**Supplementary Table S2.** Univariate analysis of clinicopathologic factors with potential to affect overall survival (OS), local-recurrence free survival (LRFS), and distant-metastasis free survival (DMFS) in CD34-negative cases

| Clinicopathologic factors | <i>OS (n = 192)</i> | <i>LRFS (n = 171)</i> | <i>DMFS (n = 171)</i> |
|---------------------------|---------------------|-----------------------|-----------------------|
|                           | <b>p-value</b>      | <b>p-value</b>        | <b>p-value</b>        |
| Age                       | 0.19                | 0.7                   | 0.4                   |
| Gender                    | 0.06                | 0.4                   | 0.3                   |
| Site                      | <b>0.04*</b>        | 0.2                   | <b>0.03*</b>          |
| Size                      | <b>0.04*</b>        | 0.6                   | <b>0.02*</b>          |
| Depth                     | <b>0.04*</b>        | <b>0.049*</b>         | 0.2                   |
| Nodal involvement         | <b>0.001*</b>       | NC                    | NC                    |
| Distant metastasis        | <b>0.001*</b>       | NC                    | NC                    |
| FNCLCC grade              | 0.09                | 0.8                   | <b>0.04*</b>          |
| Surgical margin           | 0.71                | <b>&lt;0.001*</b>     | 1                     |
| MFS vs UPS                | <b>0.04*</b>        | 1                     | 0.2                   |

\* p < 0.05

NC: Not calculated

**Supplementary Table S3.** Multivariate analysis of factors with potential to affect overall survival in CD34-negative cases

| <b>Variables</b>            | <b>p-value</b> | <b>Hazard ratio</b> | <b>95% CI</b> |
|-----------------------------|----------------|---------------------|---------------|
| Diagnosis of UPS            | <b>0.04*</b>   | 1.574               | 1.022-2.425   |
| Site (trunk vs extremity)   | 0.221          | 1.33                | 0.843-2.100   |
| Depth (deep vs superficial) | 0.334          | 1.261               | 0.788-2.017   |
| Size (<5 cm vs ≥5 cm)       | <b>0.034*</b>  | 1.878               | 1.047-3.365   |
| Nodal involvement (+ vs -)  | 0.444          | 1.535               | 0.513-4.597   |
| Distant metastasis (+ vs -) | <b>0.042*</b>  | 1.93                | 1.024-3.636   |

**Supplementary Table S4.** Primary antibodies

| <b>Antigen</b> | <b>Clone</b> | <b>Manufacturer</b>                         | <b>Dilution</b> |
|----------------|--------------|---------------------------------------------|-----------------|
| Desmin         | DE-R-11      | Leica Biosystems, Newcastle, UK             | 1:100           |
| SMA            | 1A4          | Dako, Glostrup, Denmark                     | 1:100           |
| CD34           | NU-4A1       | Nichirei, Tokyo, Japan                      | 1:5             |
| S100           | polyclonal   | Leica Biosystems, Newcastle, UK             | 1:1000          |
| CK-AE1/AE3     | AE1 and AE3  | Leica Biosystems, Newcastle, UK             | 1:200           |
| MDM2           | IF2          | Invitrogen, Waltham, MA, USA                | 1:250           |
| CDK4           | polyclonal   | Cell Signaling Technology, Danvers, MA, USA | 1:400           |
| Myogenin       | F5D          | Agilent, Santa Clara, CA, USA               | 1:500           |
| Myo-D1         | 5.2F         | Abcam, Tokyo, Japan                         | 1:200           |
| INI-1          | 25/BAF47     | BD Transduction Labs, San Diego, CA, USA    | 1:500           |
| CD31           | JC70A        | Agilent, Santa Clara, CA, USA               | 1:300           |
| STAT6          | polyclonal   | Abcam, Tokyo, Japan                         | 1:200           |
| ERG            | EP111        | Abcam, Tokyo, Japan                         | 1:100           |
